# Supplementary material for: Pro-renin receptor suppresses mitochondrial biogenesis and function via AMPK/SIRT-1/ PGC-1α pathway in diabetic kidney
Source: PubMed Central journal article supplement (PMC6892478; doi:10.1371/journal.pone.0225728), 2019-12-04
Supplement: pone.0225728.s001.pdf [file pone.0225728.s001.pdf]

# Pro-renin receptor suppresses mitochondrial biogenesis and function via AMPK/SIRT-1/ PGC-1 $\alpha$ pathway in diabetic kidney

Safia Akhtar and Helmy M Siragy

Department of Medicine, University of Virginia, Charlottesville, Virginia, USA.

**Short title:** Pro-renin receptor suppresses mitochondrial biogenesis and function

**Corresponding author:**

Email: [hms7a@virginia.edu](mailto:hms7a@virginia.edu) (HMS)

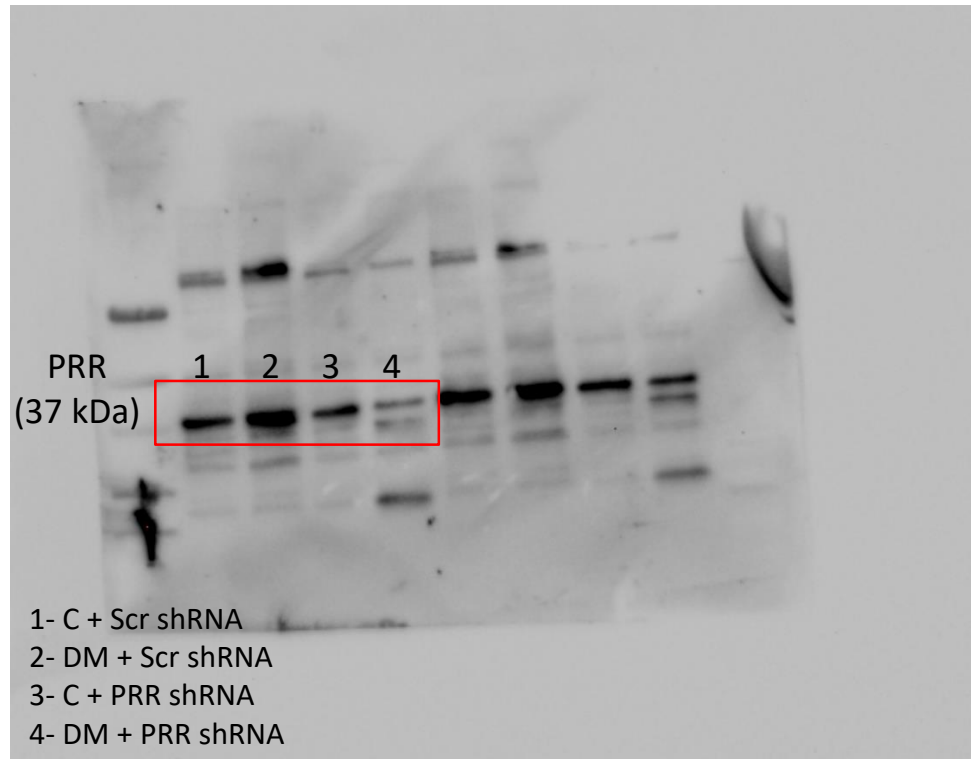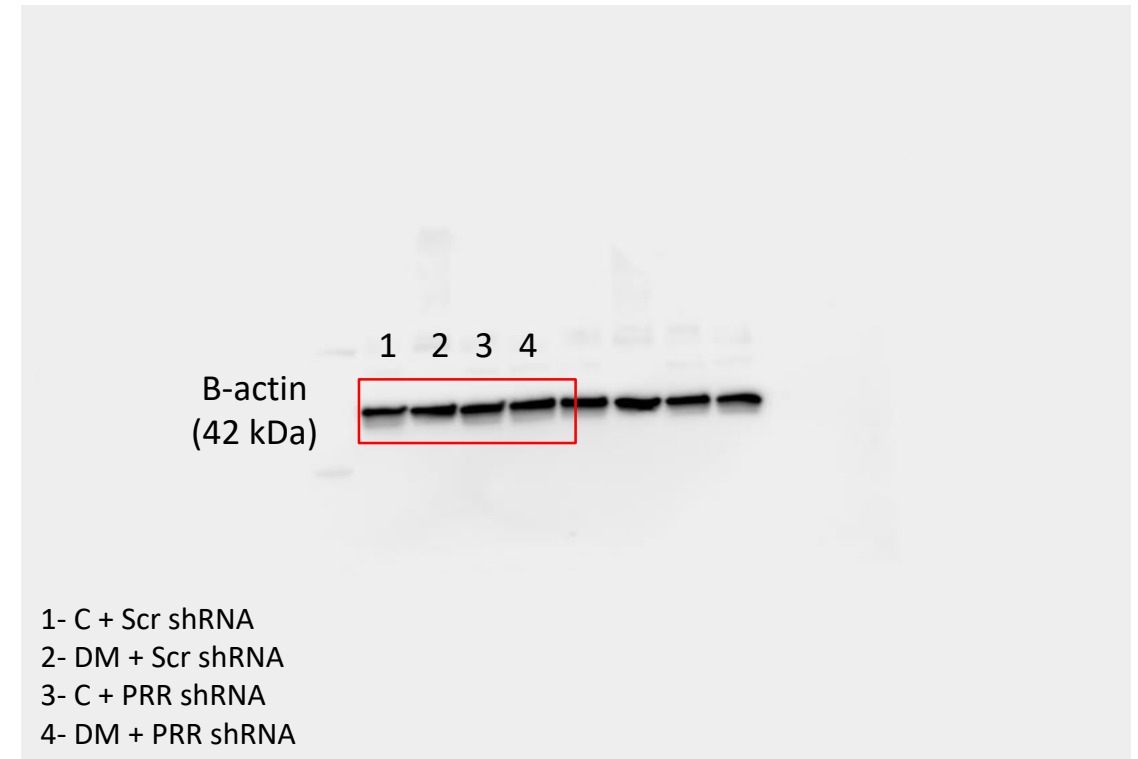

**Fig S1:** Raw western blot image of PRR and  $\beta$ -actin protein expressions in non-diabetic control mice, and streptozotocin (STZ)-induced diabetic mice treated with Scr-and PRR shRNA (correspond to Fig 2B in the manuscript).
