# Supplementary material for: Pro-renin receptor suppresses mitochondrial biogenesis and function via AMPK/SIRT-1/ PGC-1α pathway in diabetic kidney
Source: PubMed Central journal article supplement (PMC6892478; doi:10.1371/journal.pone.0225728), 2019-12-04
Supplement: pone.0225728.s004.pdf [file pone.0225728.s004.pdf]

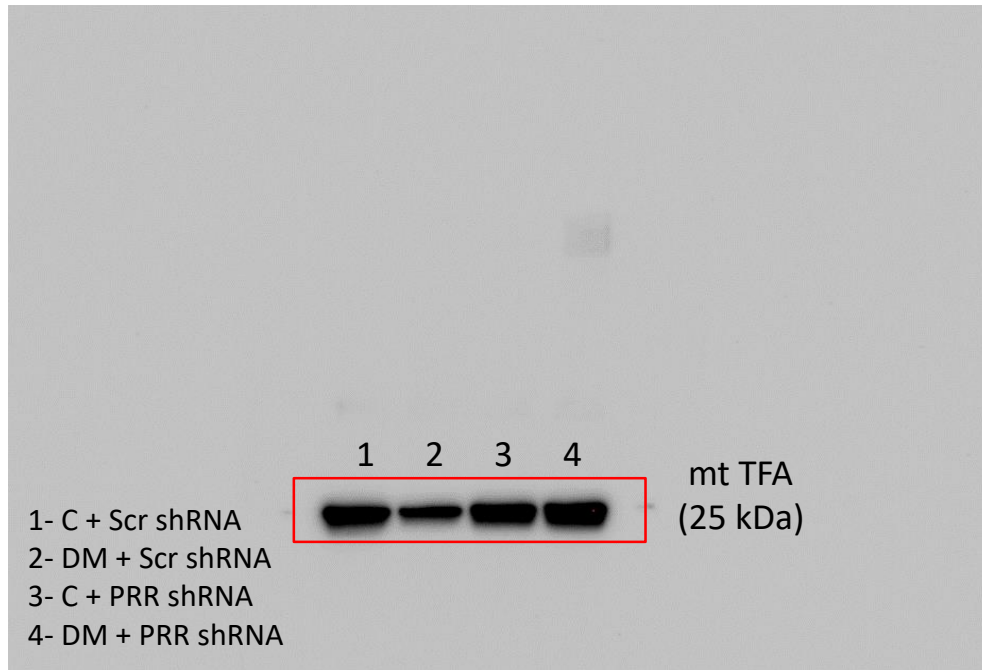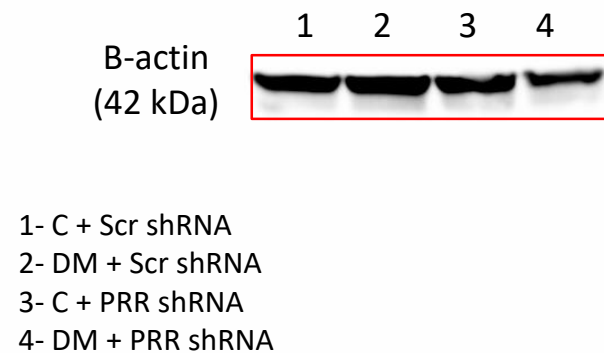

**Fig S4:** Raw western blot image of mtTFA and  $\beta$ -actin protein expressions in non-diabetic control mice, and streptozotocin (STZ)-induced diabetic mice treated with Scr-and PRR shRNA (correspond to Fig 3F in the manuscript).
