# Supplementary material for: Pro-renin receptor suppresses mitochondrial biogenesis and function via AMPK/SIRT-1/ PGC-1α pathway in diabetic kidney
Source: PubMed Central journal article supplement (PMC6892478; doi:10.1371/journal.pone.0225728), 2019-12-04
Supplement: pone.0225728.s008.pdf [file pone.0225728.s008.pdf]

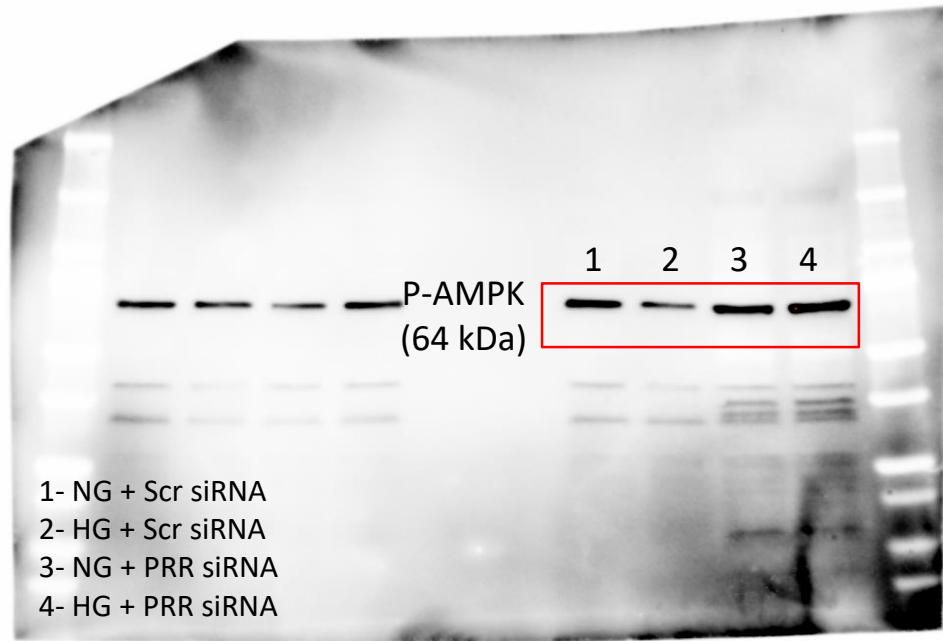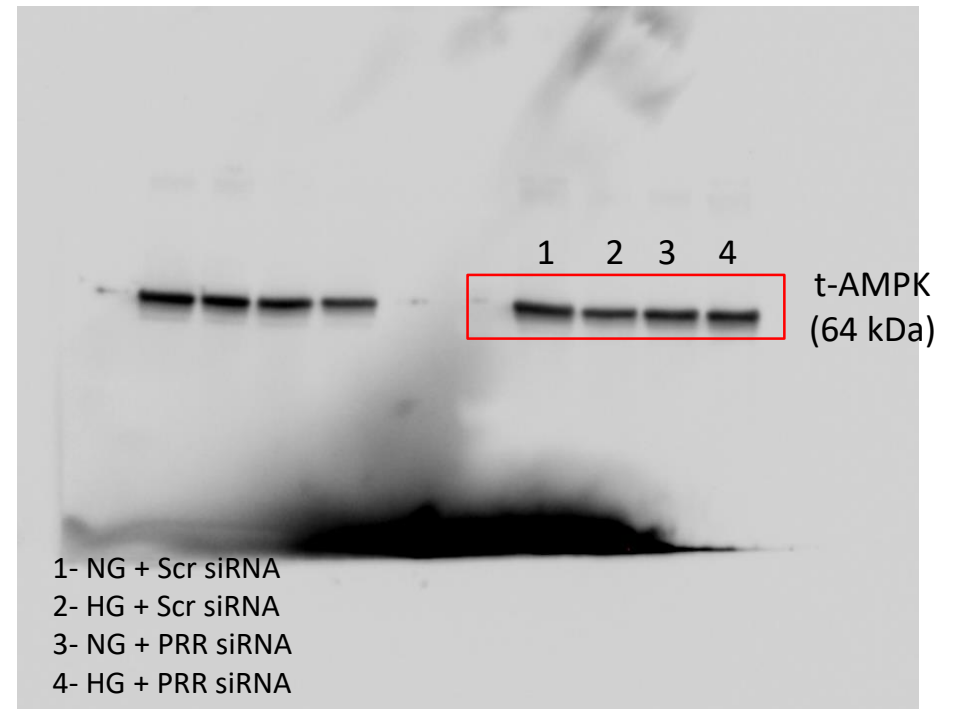

**Fig S8:** Raw western blot image of PRR and  $\beta$ -actin protein expressions in response to normal glucose (NG), and high glucose (HG) in mRMCs treated with Scr-and PRR siRNA (correspond to Fig 6C in the manuscript).
