# Supplementary material for: Pro-renin receptor suppresses mitochondrial biogenesis and function via AMPK/SIRT-1/ PGC-1α pathway in diabetic kidney
Source: PubMed Central journal article supplement (PMC6892478; doi:10.1371/journal.pone.0225728), 2019-12-04
Supplement: pone.0225728.s011.pdf [file pone.0225728.s011.pdf]

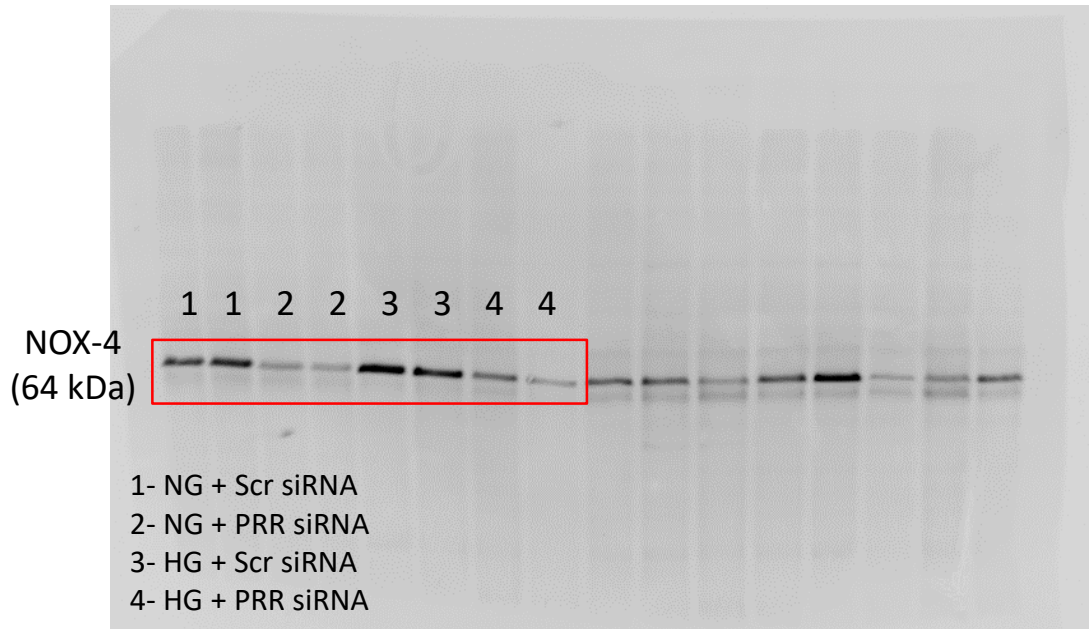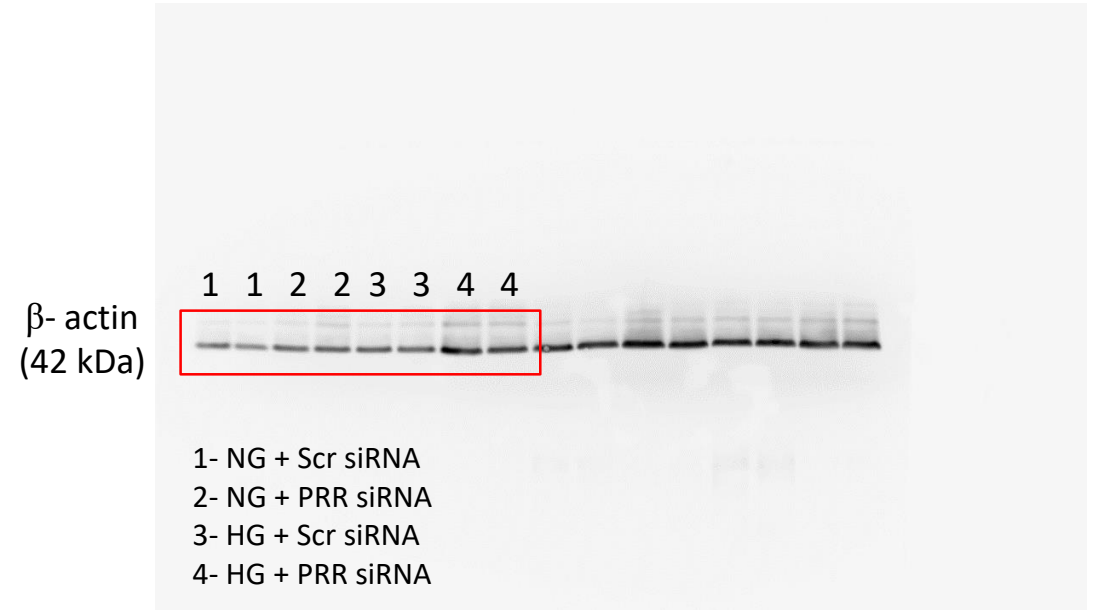

**Fig S11:** Raw western blot image of NOX-4 and  $\beta$ -actin protein expressions in response to normal glucose (NG), and high glucose (HG) in mRMCs treated with Scr-and PRR siRNA (correspond to Fig 10 B in the manuscript).
